# Supplementary material
Source: Research Square preprint supplement (doi:10.21203/rs.3.rs-9133547/v1)
Supplement: Supplementary file 1 [file d10a594e8e876afb8ab6ca5f.docx]

**Table S1 Association between baseline UHR (median split) and CMM**

| **UHR** | **Model 1** | |  | **Model 2** | |  | **Model 3** | |
| --- | --- | --- | --- | --- | --- | --- | --- | --- |
| **HR(95%CI)** | ***P*** |  | **HR(95%CI)** | ***P*** |  | **HR(95%CI)** | ***P*** |
| **＜median** | Reference |  |  | Reference |  |  | Reference |  |
| **≥ median** | 1.50 (1.36-1.65) | <0.001 |  | 1.60 (1.45-1.76) | <0.001 |  | 1.16 (1.05-1.29) | 0.004 |
| ***P* value** |  | <0.001 |  |  | <0.001 |  |  | 0.004 |


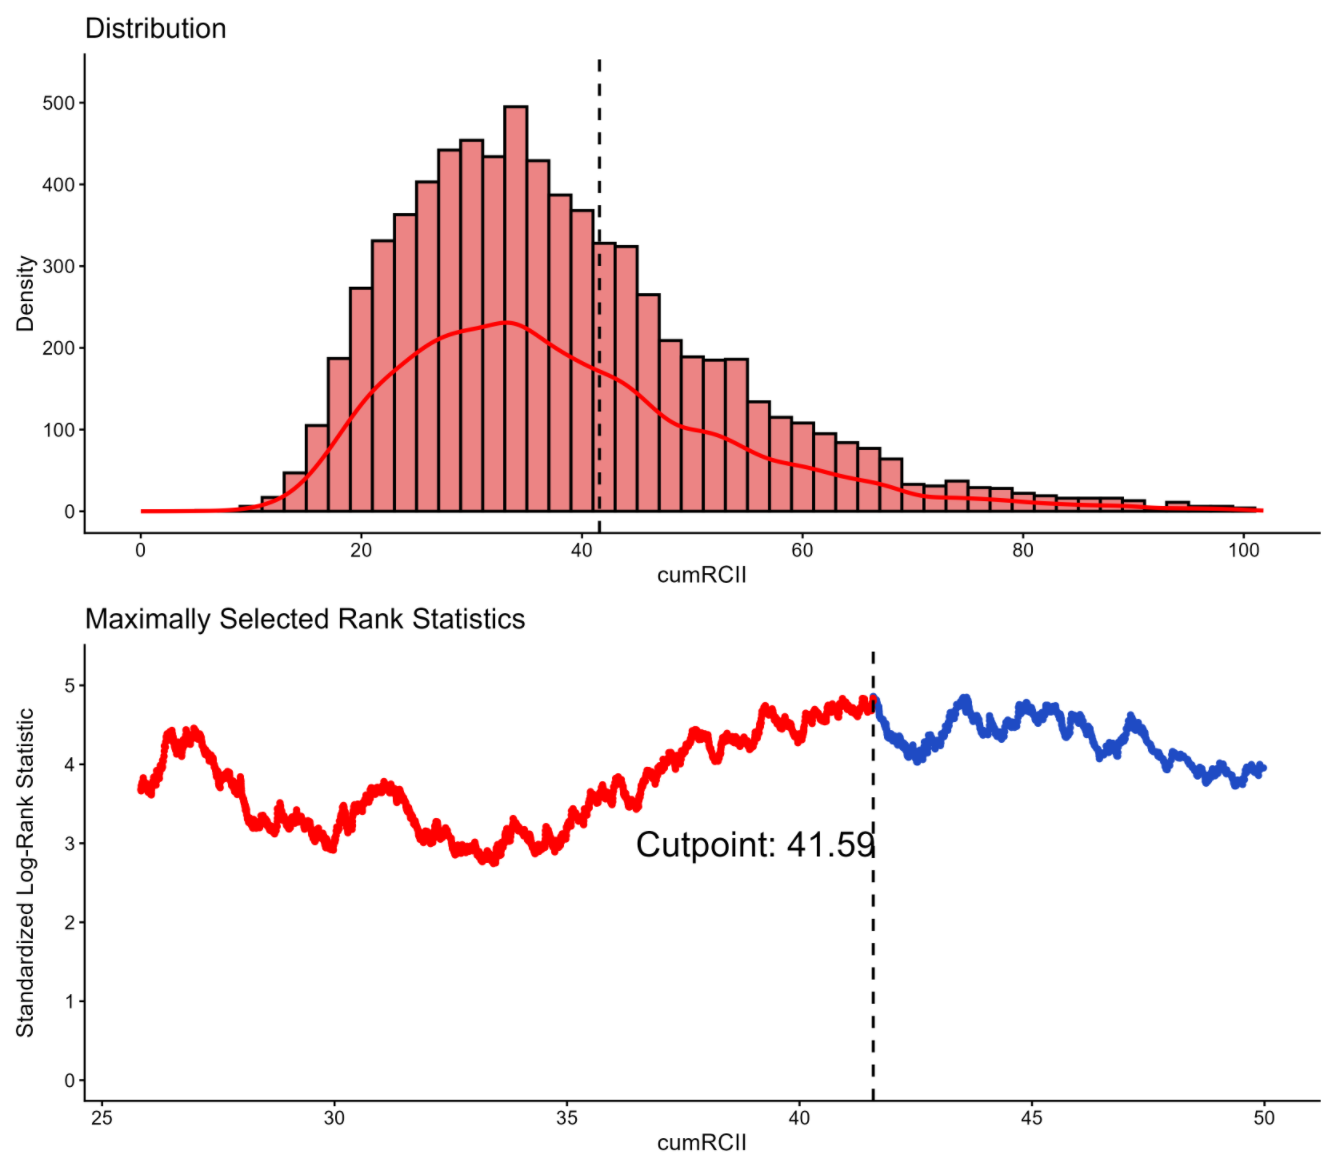


**Figure S1. Determination of the optimal cut-off value for cumulative UHR using maximally selected rank statistics.**


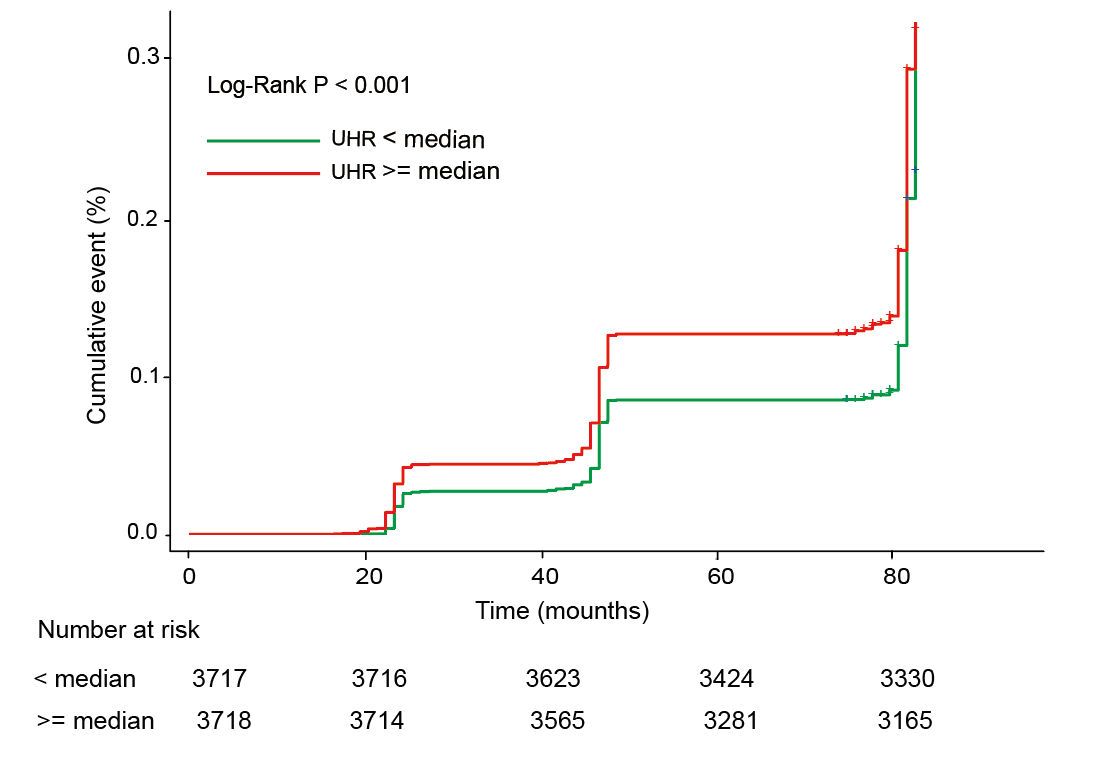


**Figure S2. Kaplan–Meier curves for cumulative events of CMM according to baseline UHR (median split)**

**
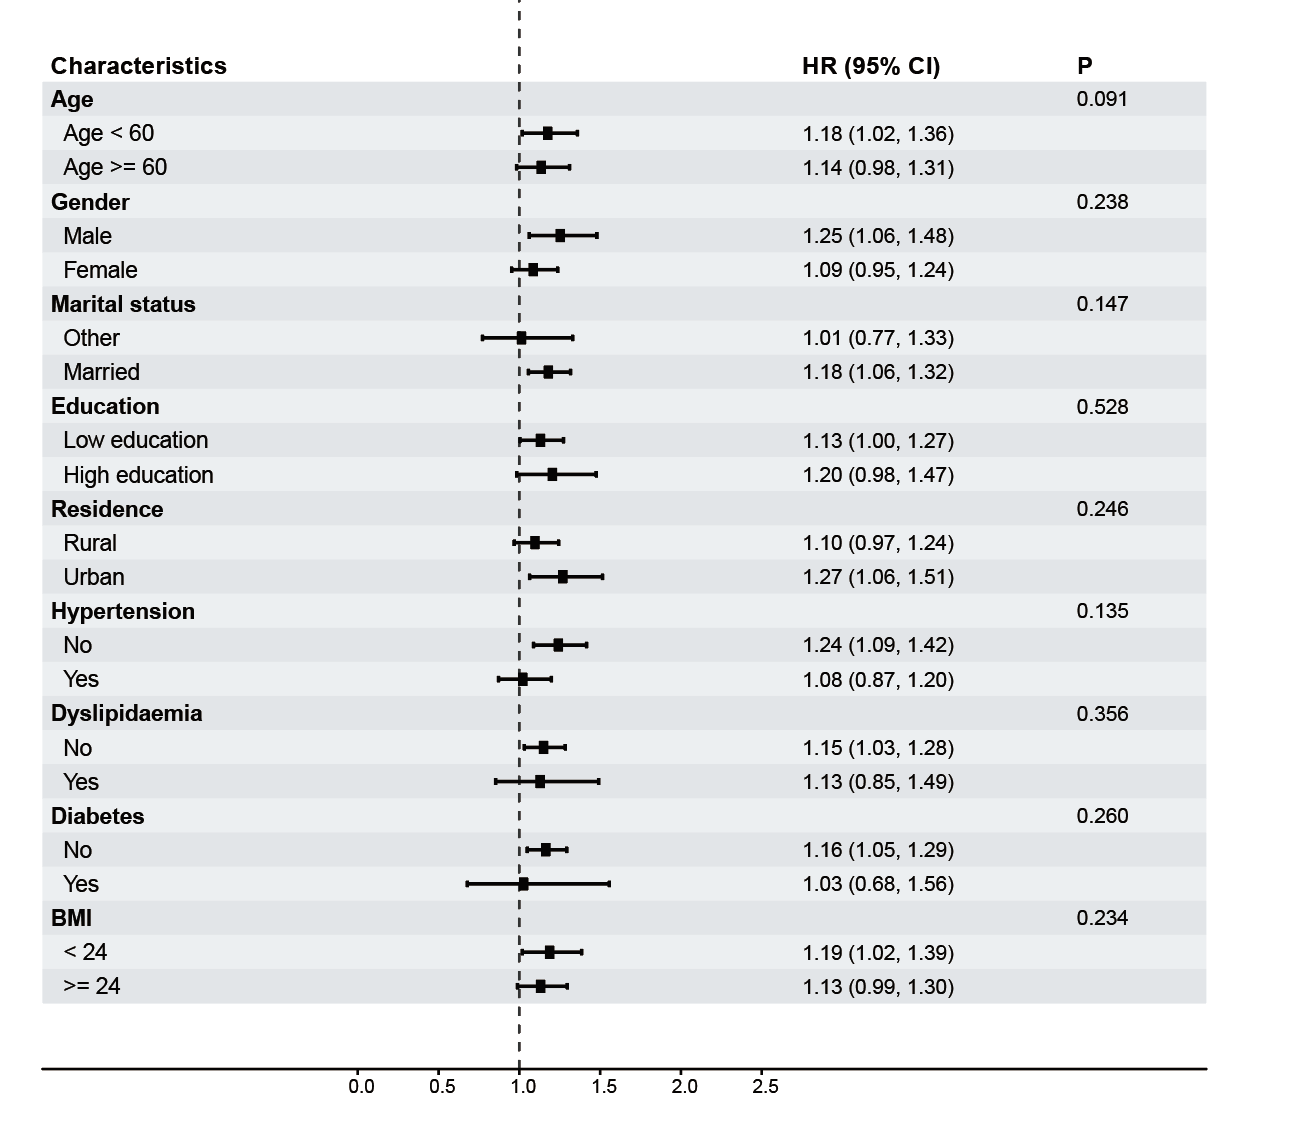
Figure S3. Subgroup and interaction analyses of the association between median UHR and risk of CMM**
